# Supplementary material for: Rapid SARS-CoV-2 Detection Using Electrochemical Immunosensor
Source: MDPI journal article supplement (doi:10.3390/s21020390), 2021-01-08
Supplement: s1 [file s1]

# Supplementary Information for Rapid SARS-CoV-2 detection using electrochemical immunosensor

Biljana Mojsoska<sup>§,1</sup> and Sylvester Larsen<sup>§,1</sup>, Dorte Aalund Olsen<sup>2,3</sup>, Jonna Skov Madsen<sup>2,3</sup>, Ivan Brandslund<sup>2,3</sup>, Fatima AlZahra'a Alatraktchi<sup>\*,1</sup>

\*Corresponding author, §Shared first authors

<sup>1</sup> Department of Science and Environment, Roskilde University, Universitetsvej 1, 4000 Roskilde, Denmark

<sup>2</sup> Department of Biochemistry and Immunology, Lillebaelt Hospital, University Hospital of Southern Denmark, Vejle, Denmark.

<sup>3</sup> Department of Regional Health Research, Faculty of Health Sciences, University of Southern Denmark, Odense, Denmark.

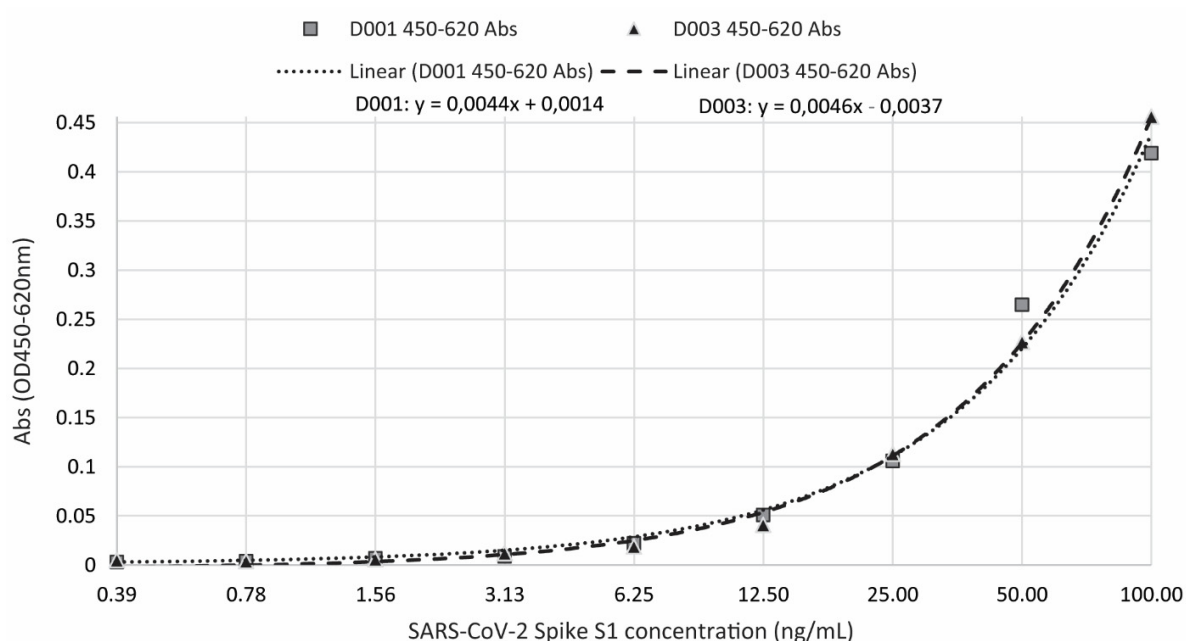

Figure S1 ELISA for validating the binding of anti-SARS-CoV-2 Spike S1 antibodies (#45150-D003 and #45150-D001) to varying concentrations of Sars-Cov-2 Spike S1 protein (#40591-V08B1).

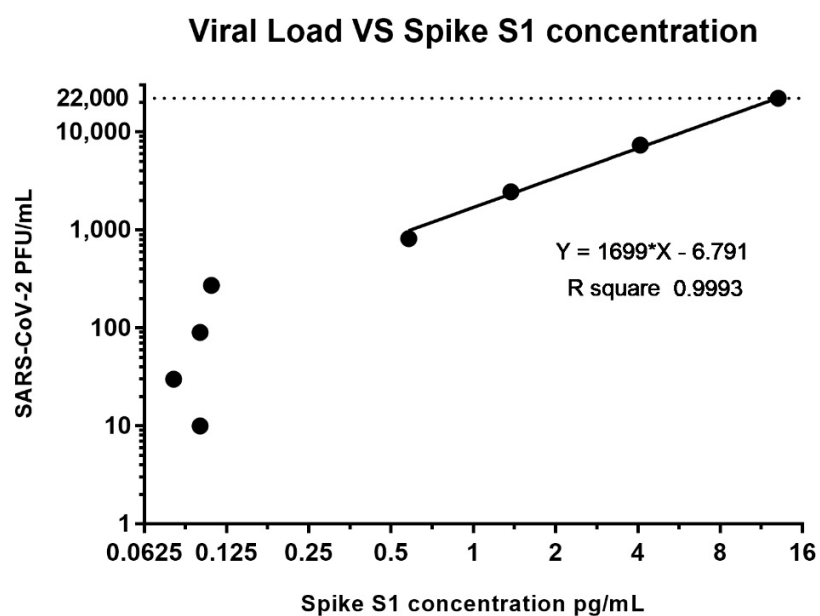

Figure S2 Comparison of Spike subunit 1 protein concentration and plaque-forming units of SARS-CoV-2 using the single-molecule array (Simoa™). Linear correlation was carried out using Graphpad Prism 7.
